# Supplementary material
Source: MDPI journal article supplement (https://www.mdpi.com/2227-9717/11/1/296)
Supplement: s1 [file s1]

# The impact of Coronavirus Disease of 2019 (COVID-19) Lockdown Restrictions on the Criteria Pollutants

Puneet Verma <sup>1,\*</sup>, Sohil Sisodiya <sup>2,\*</sup>, Sachin Kumar Banait <sup>3</sup>, Subhankar Chowdhury <sup>3</sup>, Gaurav Dwivedi <sup>3</sup>  
and Ali Zare <sup>4</sup>

<sup>1</sup> School of Earth and Atmospheric Sciences, Queensland University of Technology, Brisbane City, QLD 4000, Australia

<sup>2</sup> Department of Civil Engineering, University Departments, Rajasthan Technical University, Kota, 324010, Rajasthan, India

<sup>3</sup> Energy Centre, Maulana Azad National Institute of Technology, Bhopal 462003, India

<sup>4</sup> School of Engineering, Waurin Ponds Campus, Building KE 75 Pigdons Road, Deakin University, Waurin Ponds, Victoria, VIC 3216, Australia

\* Correspondence: puneet.verma@connect.qut.edu.au (P.V.); sohilsisodiya@gmail.com (S.S.)

**Table S1.** Data Attributes for Meteorological Parameters.

| Parameter         | Unit | Mean  | Std. Dev. | Minimum | Median | Maximum | % Data Available |
|-------------------|------|-------|-----------|---------|--------|---------|------------------|
| <b>2016</b>       |      |       |           |         |        |         |                  |
| Temperature       | °C   | 21.0  | 2.9       | 14.5    | 21.2   | 26.4    | 100              |
| Wind Speed        | m/s  | 1.9   | 0.8       | 0.9     | 1.6    | 4.9     | 100              |
| Wind Direction    | -    | 165.1 | 79.5      | 0.8     | 166.4  | 349.5   | 100              |
| Relative Humidity | %    | 64.1  | 9.3       | 39.5    | 65.2   | 86.0    | 100              |
| <b>2017</b>       |      |       |           |         |        |         |                  |
| Temperature       | °C   | 20.9  | 3.2       | 14.9    | 19.9   | 27.9    | 100              |
| Wind Speed        | m/s  | 1.7   | 0.9       | 0.7     | 1.5    | 5.2     | 100              |
| Wind Direction    | -    | 155.8 | 75.3      | 2.0     | 156.7  | 295.4   | 100              |
| Relative Humidity | %    | 67.3  | 9.5       | 26.5    | 67.7   | 86.7    | 100              |
| <b>2018</b>       |      |       |           |         |        |         |                  |
| Temperature       | °C   | 20.6  | 3.2       | 15.4    | 20.7   | 27.8    | 100              |
| Wind Speed        | m/s  | 1.8   | 0.7       | 0.7     | 1.7    | 4.4     | 100              |
| Wind Direction    | -    | 155.5 | 68.3      | 5.3     | 159.8  | 351.9   | 100              |
| Relative Humidity | %    | 67.5  | 7.7       | 37.9    | 67.7   | 85.5    | 100              |
| <b>2019</b>       |      |       |           |         |        |         |                  |
| Temperature       | °C   | 21.0  | 3.4       | 12.9    | 21.0   | 27.8    | 100              |
| Wind Speed        | m/s  | 1.8   | 0.6       | 0.8     | 1.9    | 3.6     | 100              |
| Wind Direction    | -    | 159.2 | 79.1      | 16.1    | 155.8  | 359.4   | 100              |
| Relative Humidity | %    | 64.6  | 11.3      | 35.2    | 67.5   | 82.7    | 100              |
| <b>2020</b>       |      |       |           |         |        |         |                  |
| Temperature       | °C   | 20.6  | 3.5       | 12.7    | 21.0   | 27.4    | 100              |
| Wind Speed        | m/s  | 1.6   | 0.7       | 0.5     | 1.4    | 3.6     | 100              |
| Wind Direction    | -    | 152.4 | 86.4      | 14.4    | 158.0  | 355.8   | 100              |
| Relative Humidity | %    | 65.3  | 7.2       | 42.6    | 66.1   | 87.3    | 100              |
| <b>2021</b>       |      |       |           |         |        |         |                  |
| Temperature       | °C   | 19.7  | 3.5       | 13.5    | 19.1   | 27.1    | 100              |
| Wind Speed        | m/s  | 1.4   | 0.5       | 0.6     | 1.4    | 3.2     | 100              |
| Wind Direction    | -    | 189.7 | 73.6      | 22.4    | 194.7  | 343.5   | 100              |

|                   |   |      |     |      |      |      |     |
|-------------------|---|------|-----|------|------|------|-----|
| Relative Humidity | % | 65.3 | 9.6 | 29.1 | 66.6 | 87.5 | 100 |
|-------------------|---|------|-----|------|------|------|-----|

Table S2. Statistical Data Attributes for pollutant parameters.

| Pollutant         | Unit              | Mean | Standard Deviation | Maximum | Minimum | Median | % Data Available |
|-------------------|-------------------|------|--------------------|---------|---------|--------|------------------|
| Pre-lockdown      |                   |      |                    |         |         |        |                  |
| NO <sub>2</sub>   | µg/m <sup>3</sup> | 8.9  | 4.7                | 25.1    | 0.7     | 7.6    | 100              |
| Ozone             | µg/m <sup>3</sup> | 36.4 | 10.7               | 60.8    | 15.2    | 35.2   | 100              |
| SO <sub>2</sub>   | µg/m <sup>3</sup> | 5.5  | 4.7                | 36.8    | 0.7     | 4.8    | 100              |
| PM <sub>10</sub>  | µg/m <sup>3</sup> | 13.9 | 5.2                | 48.0    | 4.6     | 13.2   | 97.5             |
| PM <sub>2.5</sub> | µg/m <sup>3</sup> | 5.7  | 2.0                | 11.8    | 1.8     | 5.5    | 97.5             |
| During-lockdown   |                   |      |                    |         |         |        |                  |
| NO <sub>2</sub>   | µg/m <sup>3</sup> | 12.3 | 6.4                | 30.8    | 1.9     | 10.9   | 100              |
| Ozone             | µg/m <sup>3</sup> | 33.7 | 8.9                | 53.1    | 11.9    | 33.4   | 100              |
| SO <sub>2</sub>   | µg/m <sup>3</sup> | 4.4  | 2.5                | 17.6    | 0.2     | 4.0    | 88.2             |
| PM <sub>10</sub>  | µg/m <sup>3</sup> | 12.8 | 4.5                | 31.9    | 5.3     | 13.2   | 100              |
| PM <sub>2.5</sub> | µg/m <sup>3</sup> | 6.5  | 2.6                | 16.5    | 2.7     | 6.0    | 100              |
| Post-lockdown     |                   |      |                    |         |         |        |                  |
| NO <sub>2</sub>   | µg/m <sup>3</sup> | 11.1 | 5.7                | 27.1    | 1.6     | 10.4   | 100              |
| Ozone             | µg/m <sup>3</sup> | 37.9 | 10.7               | 68.1    | 7.4     | 36.8   | 100              |
| SO <sub>2</sub>   | µg/m <sup>3</sup> | 4.5  | 2.6                | 22.4    | 0.1     | 3.9    | 97.7             |
| PM <sub>10</sub>  | µg/m <sup>3</sup> | 13.0 | 8.0                | 72.4    | 2.4     | 11.6   | 100              |
| PM <sub>2.5</sub> | µg/m <sup>3</sup> | 6.0  | 4.0                | 25.6    | 1.1     | 4.9    | 100              |

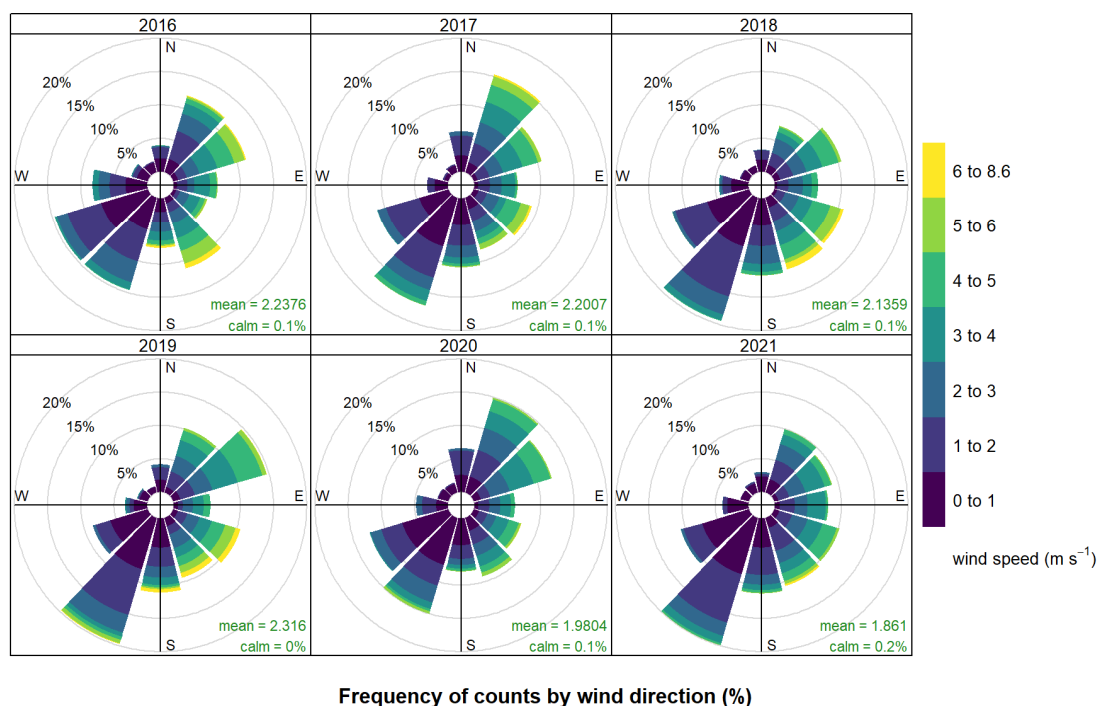

Figure S1. Windrose plots for pre-lockdown period for different years.

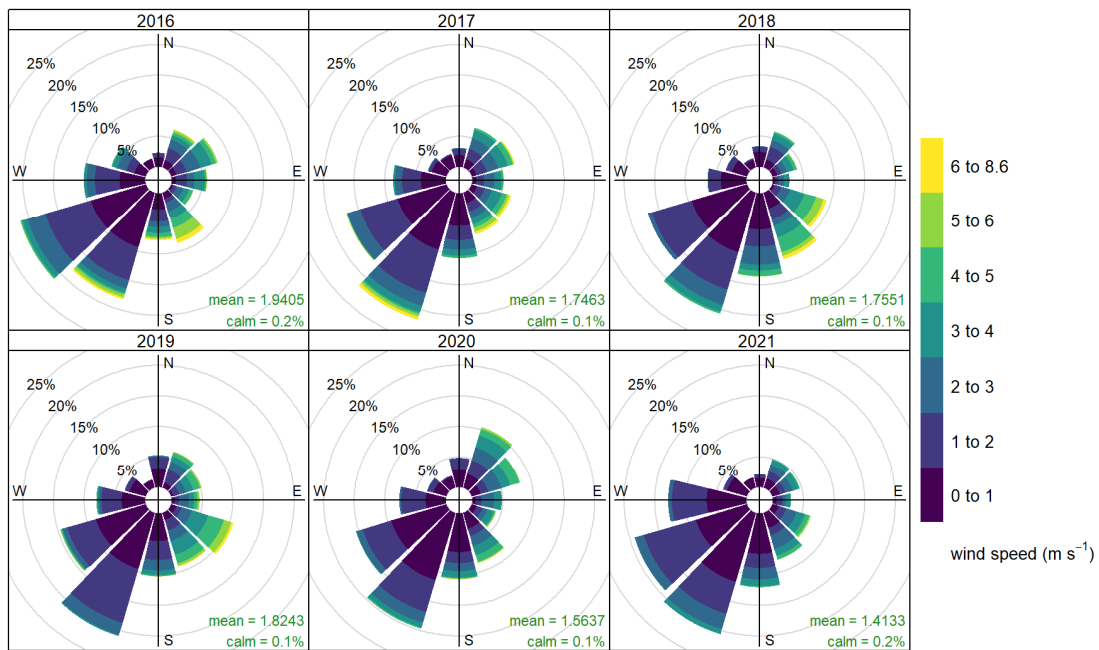

Frequency of counts by wind direction (%)

Figure S2. Windrose plots for during-lockdown period for different years.

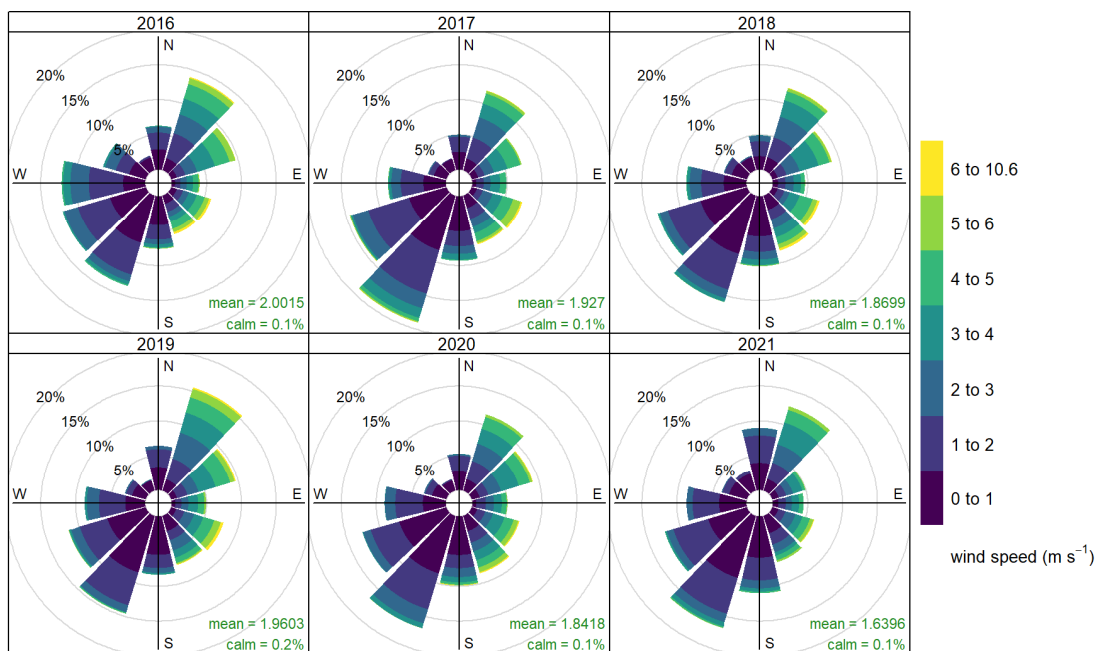

Frequency of counts by wind direction (%)

Figure S3. Windrose plots for post-lockdown period for different years.

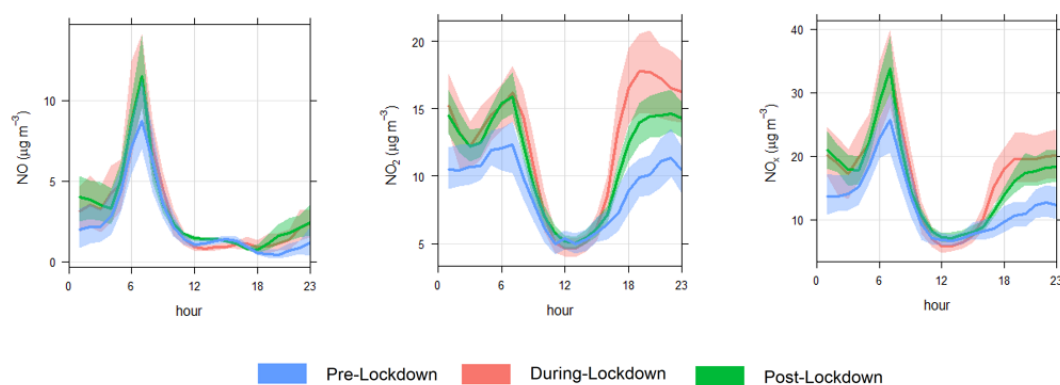

**Figure S4.** Diurnal trends of NO, NO<sub>2</sub> and NO<sub>x</sub> concentration levels at Rocklea monitoring station for year 2020.

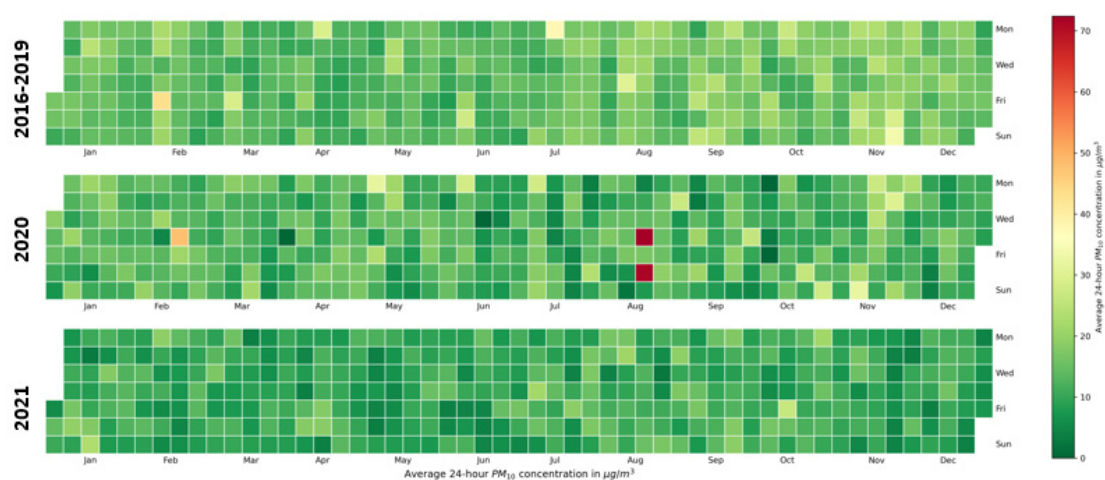

**Figure S5.** Calendar plot for Average 24-hour PM<sub>10</sub> concentration.

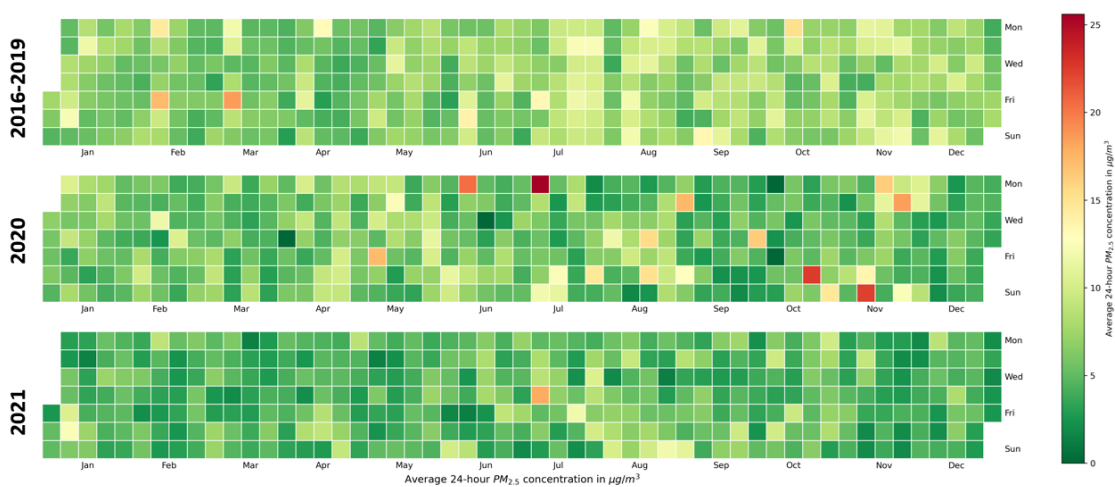

**Figure S6.** Calendar plot for Average 24-hour PM<sub>2.5</sub> concentration.

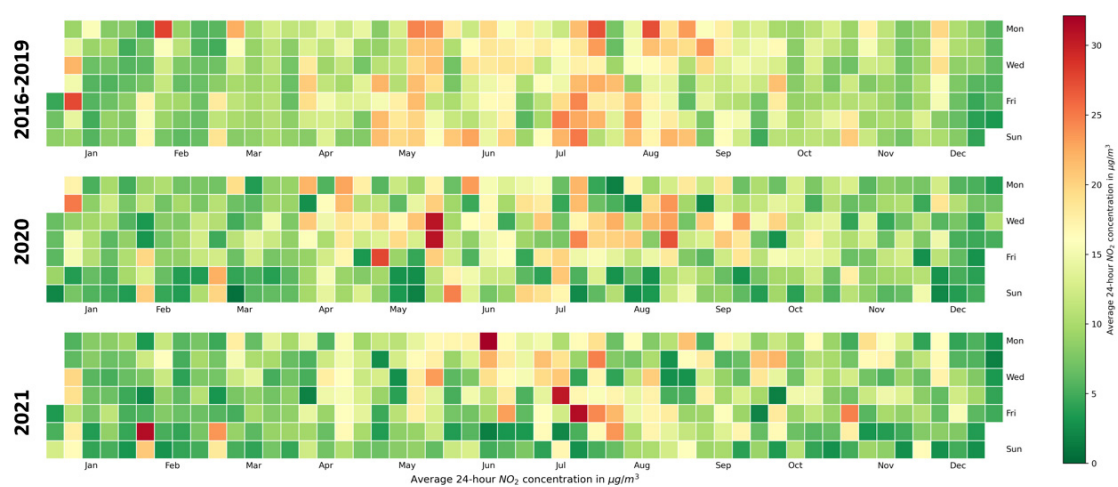

Figure S7. Calendar plot for Average 24-hour NO<sub>2</sub> concentration.

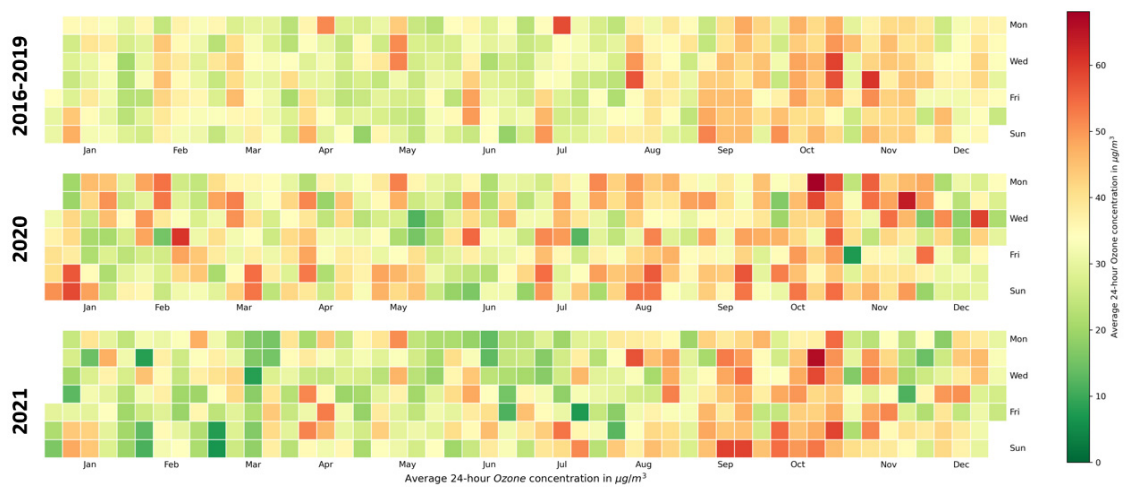

Figure S8. Calendar plot for Average 24-hour Ozone concentration.

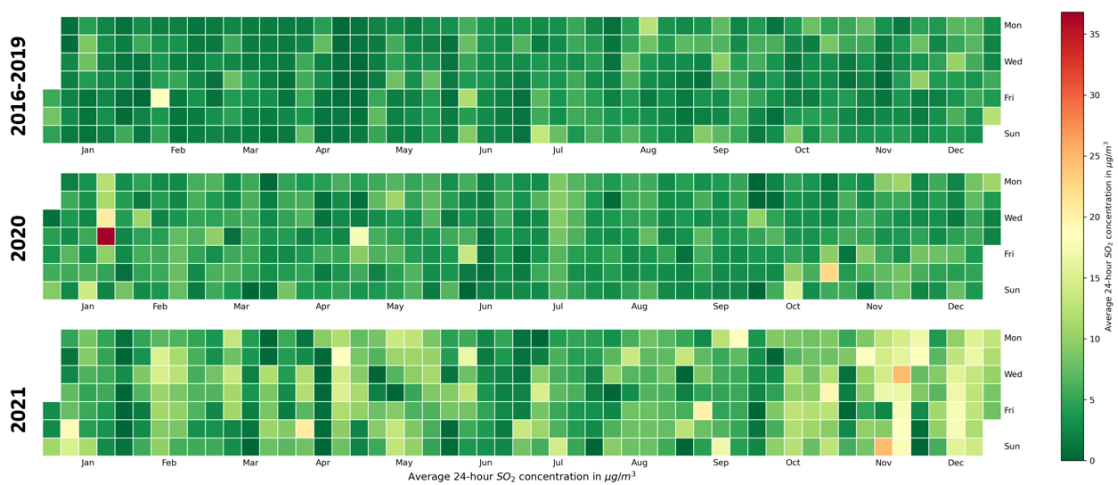

Figure S9. Calendar plot for Average 24-hour SO<sub>2</sub> concentration.
